# Supplementary material for: A Study on Chemical Characterization and Biological Abilities of Alstonia boonei Extracts Obtained by Different Techniques
Source: MDPI journal article supplement (doi:10.3390/antiox11112171), 2022-11-01
Supplement: s1 [file s1]

# **A Study on Chemical Characterization and Biological Abilities of Alstonia boonei Extracts Obtained by Different Techniques**

Adriano Mollica <sup>1</sup>, Gokhan Zengin <sup>2</sup>, Kouadio Ibrahime Sinan <sup>2</sup>, Marcella Marletta <sup>3</sup>,  
Stefano Pieretti <sup>4</sup>, Azzurra Stefanucci <sup>1,\*</sup>, Ouattara Katinan Etienne <sup>5</sup>, József Jekő <sup>6</sup>, Zoltán  
Cziáky <sup>6</sup>, Mir Babak Bahadori <sup>7</sup>, Carene Picot-Allain <sup>8</sup> and Mohamad Fawzi  
Mahomoodally <sup>8,9,10</sup>

<sup>1</sup>Department of Pharmacy, University “G. d’Annunzio” of Chieti-Pescara, 66100 Chieti,  
Italy

<sup>2</sup>Department of Biology, Faculty of Science, Selcuk University, Campus, 42250 Konya,  
Turkey

<sup>3</sup>University Guglielmo Marconi, 00193 Rome, Italy

<sup>4</sup>National Centre for Drug Research and Evaluation, Istituto Superiore di Sanità, 00161  
Rome, Italy

<sup>5</sup>Laboratoire de Botanique, UFR Biosciences, Université Félix Houphouët-Boigny, Abid-  
jan , Côte d’Ivoire

<sup>6</sup>Agricultural and Molecular Research and Service Institute, University of Nyíregyháza,  
4400 Nyíregyháza , Hungary

<sup>7</sup>Medicinal Plants Research Center, Maragheh University of Medical Sciences, Maragheh,  
Iran

<sup>8</sup>Department of Health Sciences, Faculty of Medicine and Health Sciences, University of  
Mauritius, 230 Réduit , Mauritius

<sup>9</sup>Center for Transdisciplinary Research, Department of Pharmacology, Saveetha Dental  
College, Saveetha Institute of Medical and Technical Science, Chennai 600077, India

<sup>10</sup>Centre of Excellence for Pharmaceutical Sciences, North-West University, Private Bag  
X6001, Potchefstroom, 2520, South Africa

\*Correspondence: a.stefanucci@unich.it

*Total phenolic and flavonoid content*

The total phenolic content was determined by employing the methods given in the literature with some modification. Sample solution (0.25 mL) was mixed with diluted Folin–Ciocalteu reagent (1 mL, 1:9, v/v) and shaken vigorously. After 3 min, Na<sub>2</sub>CO<sub>3</sub> solution (0.75 mL, 1%) was added and the sample absorbance was read at 760 nm after a 2 h incubation at room temperature. The total phenolic content was expressed as milligrams of gallic acid equivalents (mg GAE/g extract)[1].

The total flavonoid content was determined using the AlCl<sub>3</sub> method. Briefly, sample solution (1 mL) was mixed with the same volume of aluminum trichloride (2%) in methanol. Similarly, a blank was prepared by adding sample solution (1 mL) to methanol (1 mL) without AlCl<sub>3</sub>. The sample and blank absorbances were read at 415 nm after a 10 min incubation at room temperature. The absorbance of the blank was subtracted from that of the sample. Rutin was used as a reference standard and the total flavonoid content was expressed as milligrams of rutin equivalents (mg RE/g extract) [1]

In order to separate compounds chromatographically, a Dionex Ultimate 3000RS UH-PLC instrument was used. This apparatus was fitted with a Thermo Accucore C18 (100 mm 2.1 mm i. d., 2.6 m) analytical column. The mobile phases used were H<sub>2</sub>O (A) and methanol (B), each of which contained 0.1% formic acid. An elution profile took 70 minutes to complete. In both positive and negative-ion mode, mass spectra were analyzed with a

Thermo Q-Exactive Orbitrap mass spectrometer (Thermo Scientific, Waltham, MA, USA). All detailed analytical conditions have been published [2].

#### *Determination of Antioxidant and Enzyme Inhibitory Effects*

Antioxidant (DPPH and ABTS radical scavenging, reducing power (CUPRAC and FRAP), phosphomolybdenum and metal chelating (ferrozine method)) and enzyme inhibitory activities (cholinesterase (Elmann's method), tyrosinase (dopachrome method),  $\alpha$ -amylase (iodine/potassium iodide method),  $\alpha$ -glucosidase (chromogenic PNPG method) and pancreatic lipase (*p*-nitrophenyl butyrate (p-NPB) method) were determined using the methods previously described by Uysal et al. [1] and Grochowski et al. [3]

For the DPPH (1,1-diphenyl-2-picrylhydrazyl) radical scavenging assay: Sample solution was added to 4 mL of a 0.004% methanol solution of DPPH. The sample absorbance was read at 517 nm after a 30 min incubation at room temperature in the dark. DPPH radical scavenging activity was expressed as milligrams of trolox equivalents (mg TE/g extract).

For ABTS (2,2'-azino-bis(3-ethylbenzothiazoline) 6-sulfonic acid) radical scavenging assay: Briefly, ABTS<sup>+</sup> was produced directly by reacting 7 mM ABTS solution with 2.45 mM potassium persulfate and allowing the mixture to stand for 12–16 h in the dark at room temperature. Prior to beginning the assay, ABTS solution was diluted with methanol to an absorbance of  $0.700 \pm 0.02$  at 734 nm. Sample solution was added to ABTS solution (2 mL) and mixed. The sample absorbance was read at 734 nm after a 30 min incubation at room temperature. The ABTS radical scavenging activity was expressed as milligrams of trolox equivalents (mg TE/g extract).

For CUPRAC (cupric ion reducing activity) activity assay: Sample solution was added to premixed reaction mixture containing  $\text{CuCl}_2$  (1 mL, 10 mM), neocuproine (1 mL, 7.5 mM) and  $\text{NH}_4\text{Ac}$  buffer (1 mL, 1 M, pH 7.0). Similarly, a blank was prepared by adding sample solution (0.5 mL) to premixed reaction mixture (3 mL) without  $\text{CuCl}_2$ . Then, the sample and blank absorbances were read at 450 nm after a 30 min incubation at room temperature. The absorbance of the blank was subtracted from that of the sample. CUPRAC activity was expressed as milligrams of trolox equivalents (mg TE/g extract).

For FRAP (ferric reducing antioxidant power) activity assay: Sample solution was added to premixed FRAP reagent (2 mL) containing acetate buffer (0.3 M, pH 3.6), 2,4,6-tris(2-pyridyl)-S-triazine (TPTZ) (10 mM) in 40 mM HCl and ferric chloride (20 mM) in a ratio of 10:1:1 (v/v/v). Then, the sample absorbance was read at 593 nm after a 30 min incubation at room temperature. FRAP activity was expressed as milligrams of trolox equivalents (mg TE/g extract).

For phosphomolybdenum method: Sample solution was combined with 3 mL of reagent solution (0.6 M sulfuric acid, 28 mM sodium phosphate and 4 mM ammonium molybdate). The sample absorbance was read at 695 nm after a 90 min incubation at 95 °C. The total antioxidant capacity was expressed as millimoles of trolox equivalents (mmol TE/g extract).

For metal chelating activity assay: Briefly, sample solution was added to  $\text{FeCl}_2$  solution (0.05 mL, 2 mM). The reaction was initiated by the addition of 5 mM ferrozine (0.2 mL). Similarly, a blank was prepared by adding sample solution (2 mL) to  $\text{FeCl}_2$  solution (0.05 mL, 2 mM) and water (0.2 mL) without ferrozine. Then, the sample and blank absorbances were read at 562 nm after 10 min incubation at room temperature. The absorbance of the blank was subtracted from that of the sample. The metal chelating

activity was expressed as milligrams of EDTA (disodium edetate) equivalents (mg EDTAE/g extract).

For Cholinesterase (ChE) inhibitory activity assay: Sample solution (was mixed with DTNB (5,5-dithio-bis(2-nitrobenzoic) acid, Sigma, St. Louis, MO, USA) (125  $\mu$ L) and AChE (acetylcholines-terase (Electric ell acetylcholinesterase, Type-VI-S, EC 3.1.1.7, Sigma)), or BChE (butyrylcholinesterase (horse serum butyrylcholinesterase, EC 3.1.1.8, Sigma)) solution (25  $\mu$ L) in Tris-HCl buffer (pH 8.0) in a 96-well microplate and incubated for 15 min at 25 °C. The reaction was then initiated with the addition of acetylthiocholine iodide (ATCI, Sigma) or butyrylthiocholine chloride (BTCL, Sigma) (25  $\mu$ L). Similarly, a blank was prepared by adding sample solution to all reaction reagents without enzyme (AChE or BChE) solution. The sample and blank absorbances were read at 405 nm after 10 min incubation at 25 °C. The absorbance of the blank was subtracted from that of the sample and the cholinesterase inhibitory activity was expressed as galanthamine equivalents (mgGALAE/g extract).

For Tyrosinase inhibitory activity assay: Sample solution was mixed with tyrosinase solution (40  $\mu$ L, Sigma) and phosphate buffer (100  $\mu$ L, pH 6.8) in a 96-well microplate and incubated for 15 min at 25 °C. The reaction was then initiated with the addition of L-DOPA (40  $\mu$ L, Sigma). Similarly, a blank was prepared by adding sample solution to all reaction reagents without enzyme (tyrosinase) solution. The sample and blank absorbances were read at 492 nm after a 10 min incubation at 25 °C. The absorbance of the blank was subtracted from that of the sample and the tyrosinase inhibitory activity was expressed as kojic acid equivalents (mgKAE/g extract).

For  $\alpha$ -amylase inhibitory activity assay: Sample solution was mixed with  $\alpha$ -amylase solution (ex-porcine pancreas, EC 3.2.1.1, Sigma) (50  $\mu$ L) in phosphate buffer (pH

6.9 with 6 mM sodium chloride) in a 96-well microplate and incubated for 10 min at 37 °C. After pre-incubation, the reaction was initiated with the addition of starch solution (50 µL, 0.05%). Similarly, a blank was prepared by adding sample solution to all reaction reagents without enzyme ( $\alpha$ -amylase) solution. The reaction mixture was incubated 10 min at 37 °C. The reaction was then stopped with the addition of HCl (25 µL, 1 M). This was followed by addition of the iodine-potassium iodide solution (100 µL). The sample and blank absorbances were read at 630 nm. The absorbance of the blank was subtracted from that of the sample and the  $\alpha$ -amylase inhibitory activity was expressed as acarbose equivalents (mmol ACE/g extract).

For  $\alpha$ -glucosidase inhibitory activity assay: Sample solution was mixed with glutathione (50 µL),  $\alpha$ -glucosidase solution (from *Saccharomyces cerevisiae*, EC 3.2.1.20, Sigma) (50 µL) in phosphate buffer (pH 6.8) and PNPG (4-N-trophenyl- $\alpha$ -D-glucopyranoside, Sigma) (50 µL) in a 96-well microplate and incubated for 15 min at 37 °C. Similarly, a blank was prepared by adding sample solution to all reaction reagents without enzyme ( $\alpha$ -glucosidase) solution. The reaction was then stopped with the addition of sodium carbonate (50 µL, 0.2 M). The sample and blank absorbances were read at 400 nm. The absorbance of the blank was subtracted from that of the sample and the  $\alpha$ -glucosidase inhibitory activity was expressed as acarbose equivalents (mmol ACE/g extract).

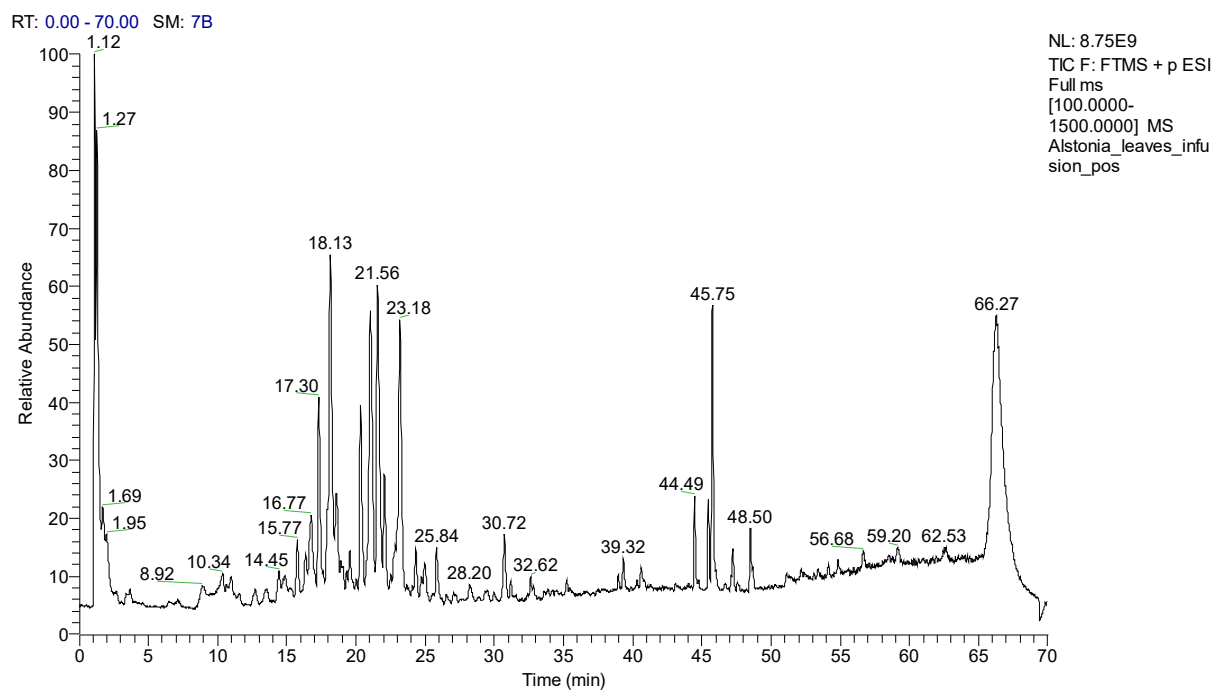

Figure S1. Total ion chromatogram of *Alstonia boonei* leaves infusion in positive mode

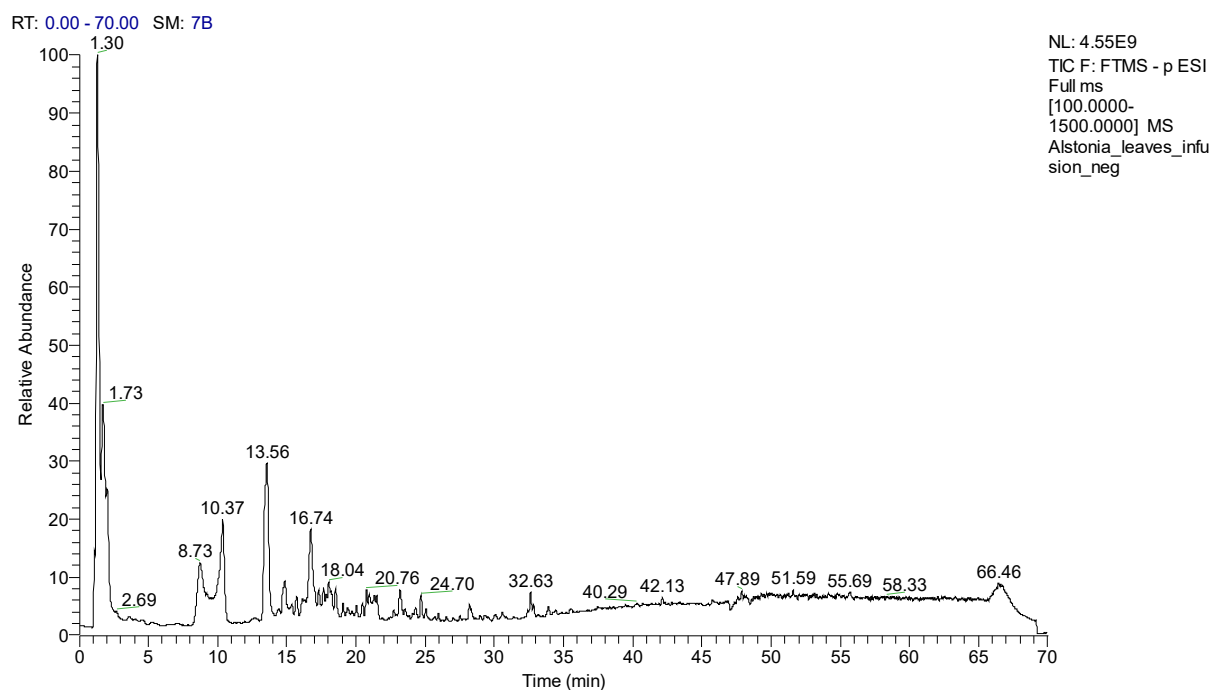

Figure S2. Total ion chromatogram of *Alstonia boonei* leaves infusion in negative mode

RT: 0.00 - 70.00 SM: 7B

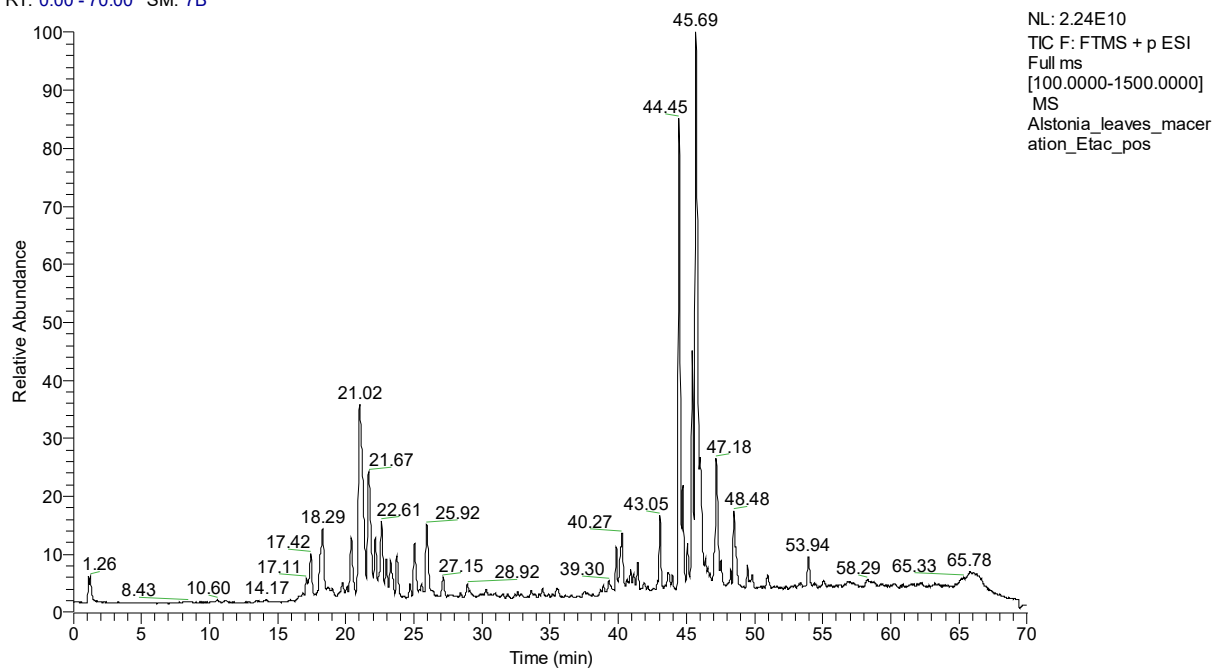

Figure S3. Total ion chromatogram of *Alstonia boonei* leaves maceration-EA in positive mode

RT: 0.00 - 70.00 SM: 7B

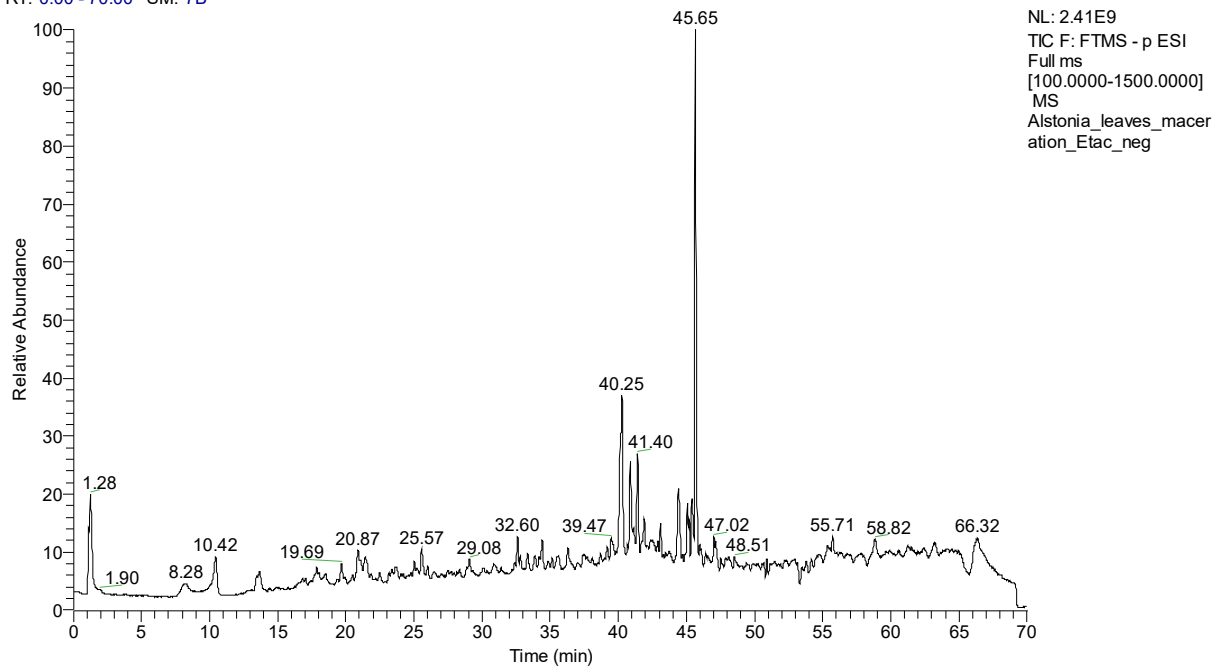

Figure S4. Total ion chromatogram of *Alstonia boonei* leaves maceration-EA in negative mode

RT: 0.00 - 70.00 SM: 7B

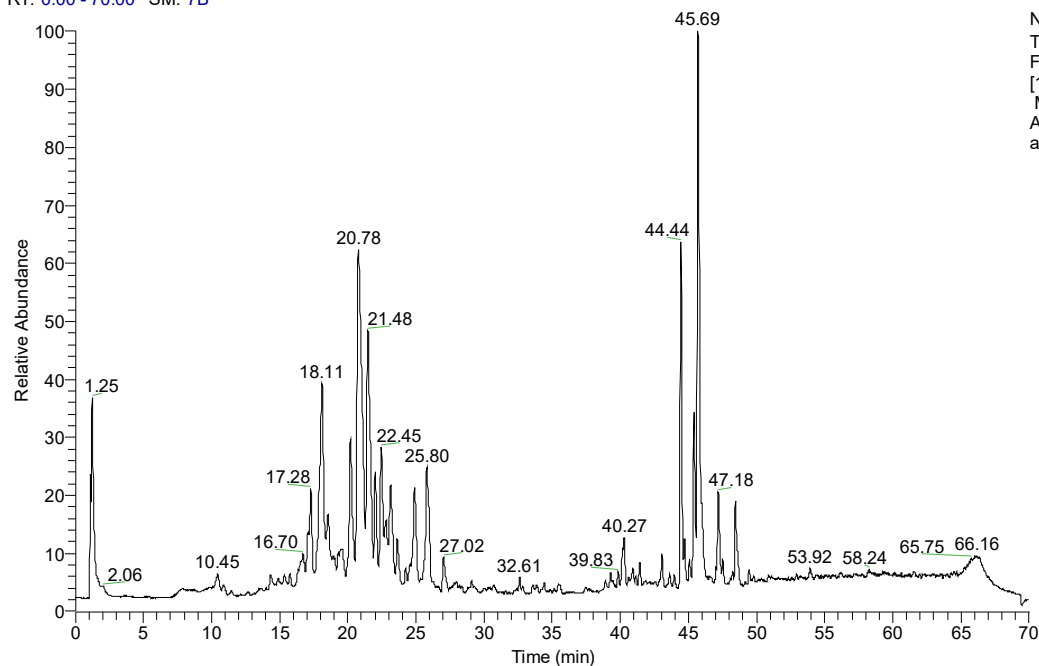

NL: 1.61E10  
TIC F: FTMS + p ESI  
Full ms  
[100.0000-1500.0000]  
MS  
Alstonia\_leaves\_maceration\_MeOH\_pos

Figure S5. Total ion chromatogram of *Alstonia boonei* leaves maceration-MeOH in positive mode

RT: 0.00 - 70.00 SM: 7B

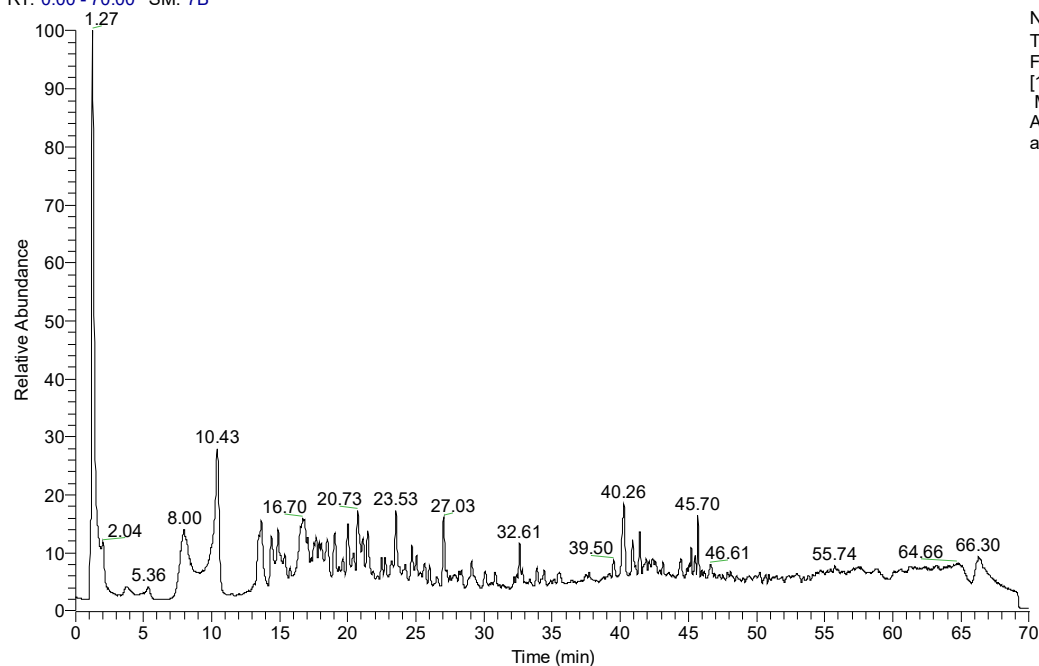

NL: 3.24E9  
TIC F: FTMS - p ESI  
Full ms  
[100.0000-1500.0000]  
MS  
Alstonia\_leaves\_maceration\_MeOH\_neg

Figure S6. Total ion chromatogram of *Alstonia boonei* leaves maceration-MeOH in negative mode

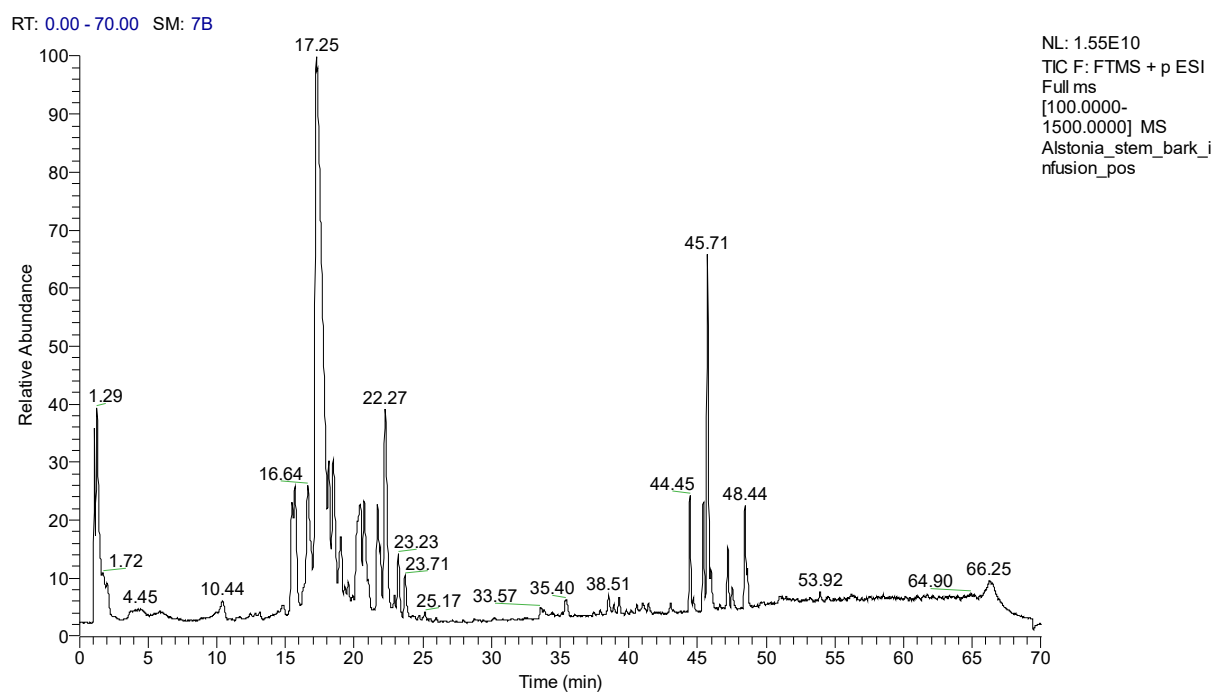

Figure S7. Total ion chromatogram of *Alstonia boonei* stem bark infusion in positive mode

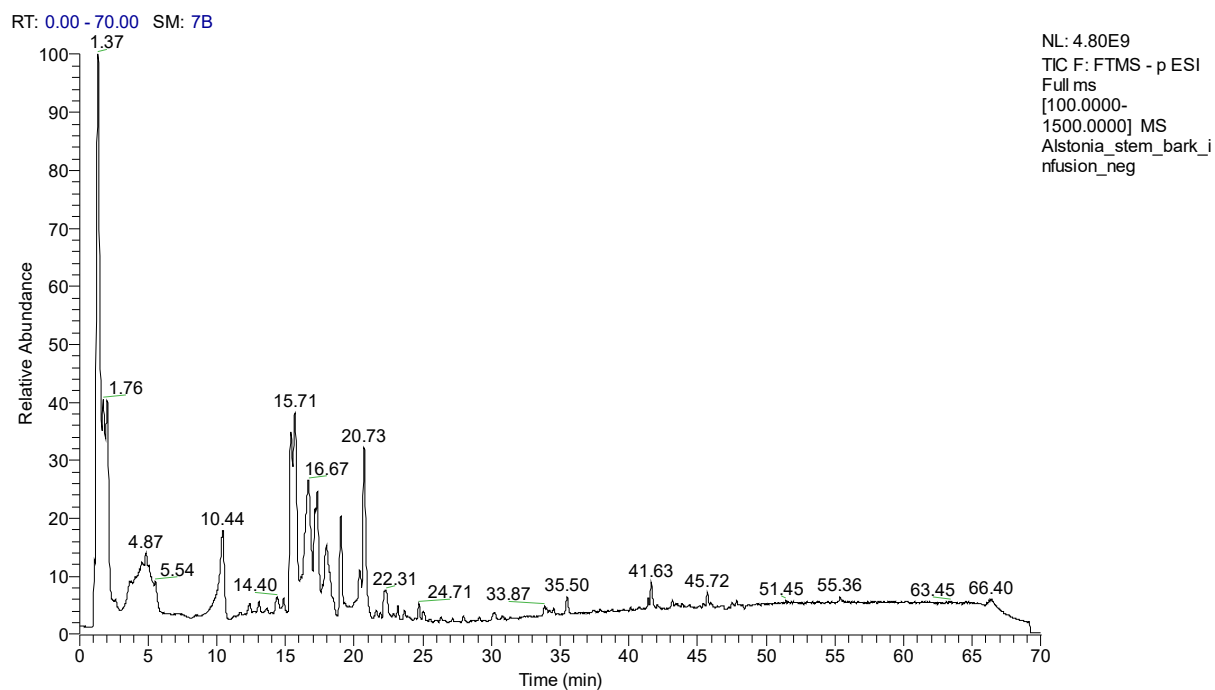

Figure S8. Total ion chromatogram of *Alstonia boonei* stem bark infusion in negative mode

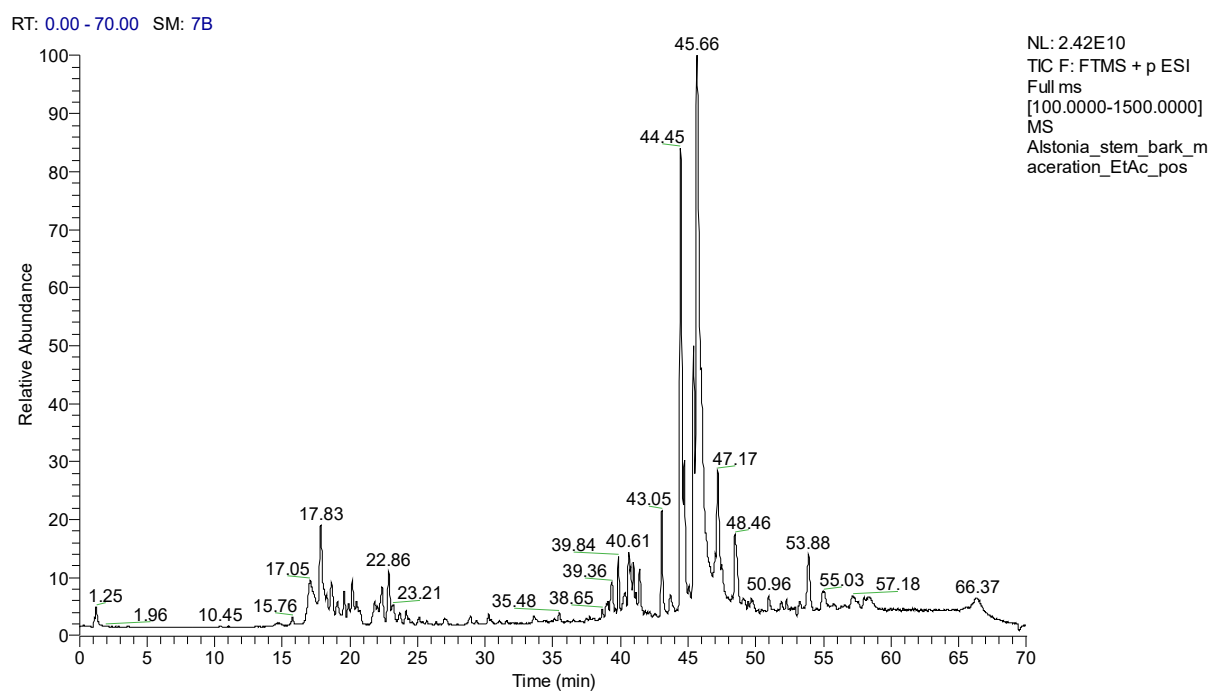

Figure S9. Total ion chromatogram of *Alstonia boonei* stem bark maceration -EA in positive mode

RT: 0.00 - 70.00 SM: 7B

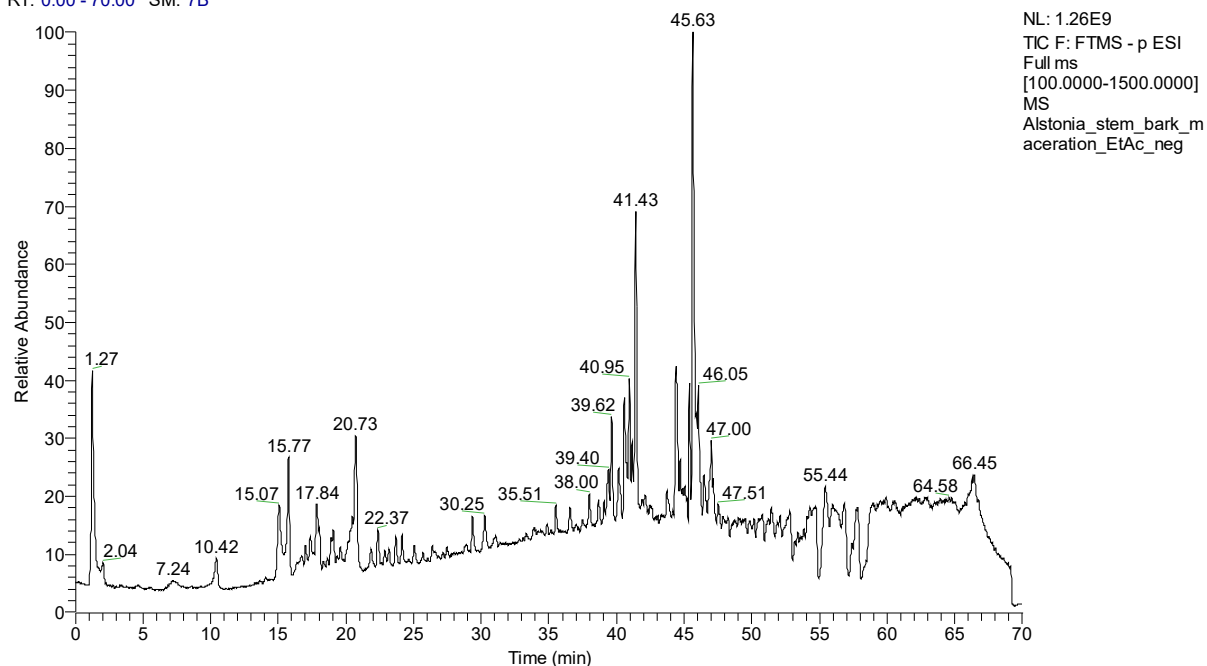

Figure S10. Total ion chromatogram of *Alstonia boonei* stem bark maceration -EA in negative mode

RT: 0.00 - 70.00 SM: 7B

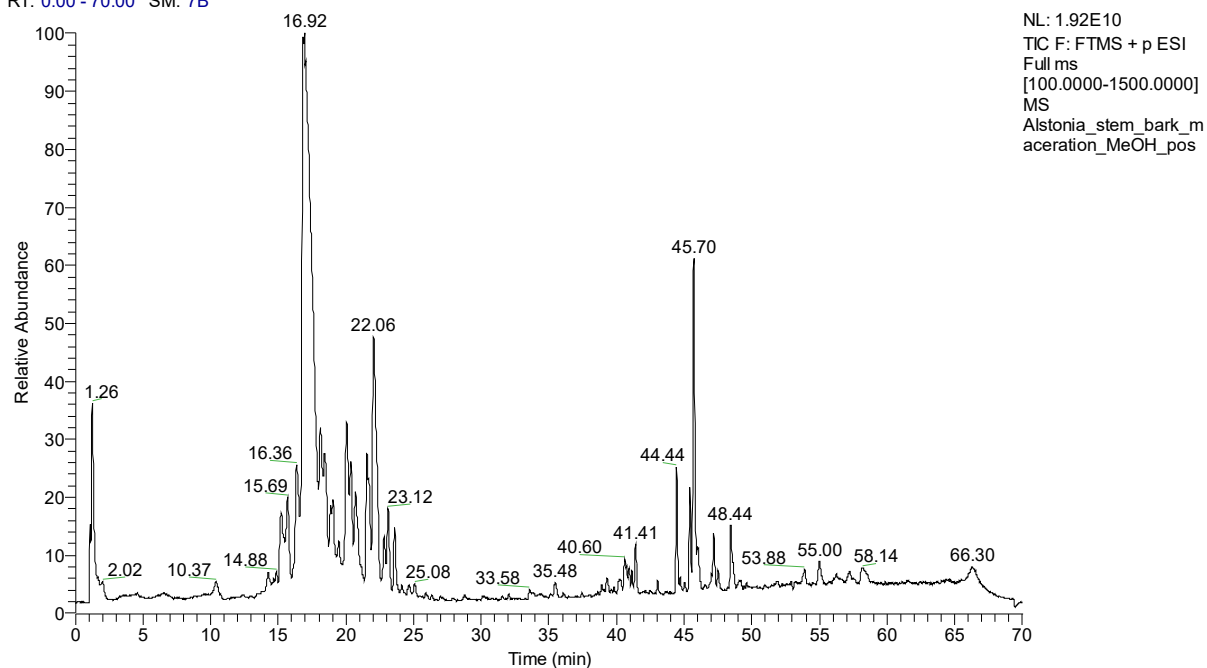

Figure S11. Total ion chromatogram of *Alstonia boonei* stem bark maceration -MeOH in positive mode

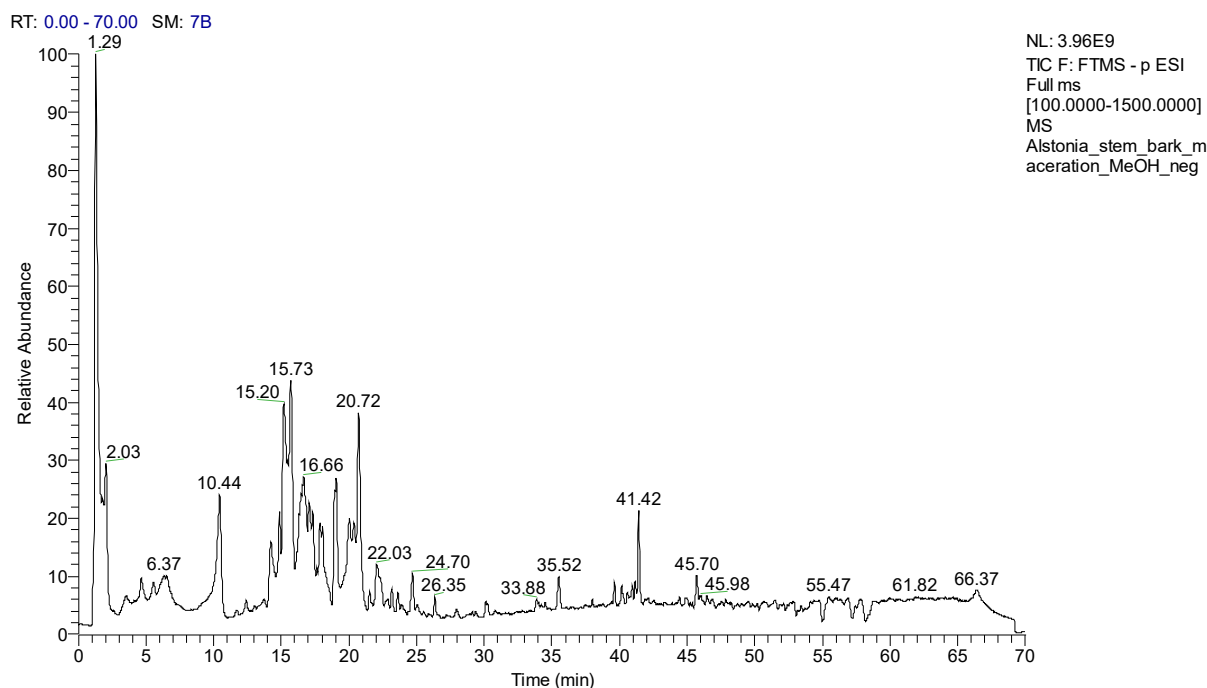

Figure S12. Total ion chromatogram of *Alstonia boonei* stem bark maceration -MeOH in negative mode

## References

1. Uysal, S.; Zengin, G.; Locatelli, M.; Bahadori, M. B.; Mocan, A.; Bellagamba, G.; De Luca, E.; Mollica, A.; Aktumsek, A., Cytotoxic and enzyme inhibitory potential of two *Potentilla* species (*P. speciosa* L. and *P. reptans* Willd.) and their chemical composition. *Frontiers in pharmacology* **2017**, *8*, 290.
2. Zengin, G.; Uysal, A.; Diuzheva, A.; Gunes, E.; Jekő, J.; Cziáky, Z.; Picot-Allain, C. M. N.; Mahomoodally, M. F., Characterization of phytochemical components of *Ferula halophila* extracts using HPLC-MS/MS and their pharmacological potentials: A multi-functional insight. *Journal of pharmaceutical and biomedical analysis* **2018**, *160*, 374-382.
3. Grochowski, D. M.; Uysal, S.; Aktumsek, A.; Granica, S.; Zengin, G.; Ceylan, R.; Locatelli, M.; Tomczyk, M., In vitro enzyme inhibitory properties, antioxidant activities, and phytochemical profile of *Potentilla thuringiaca*. *Phytochemistry Letters* **2017**, *20*, 365-372.
